# Supplementary material for: Localization of EccA3 at the growing pole in Mycobacterium smegmatis
Source: PubMed Central journal article supplement (PMC9118679; doi:10.1186/s12866-022-02554-6), 2022-05-19
Supplement: 12866_2022_2554_MOESM2_ESM.pdf [file 12866_2022_2554_MOESM2_ESM.pdf]

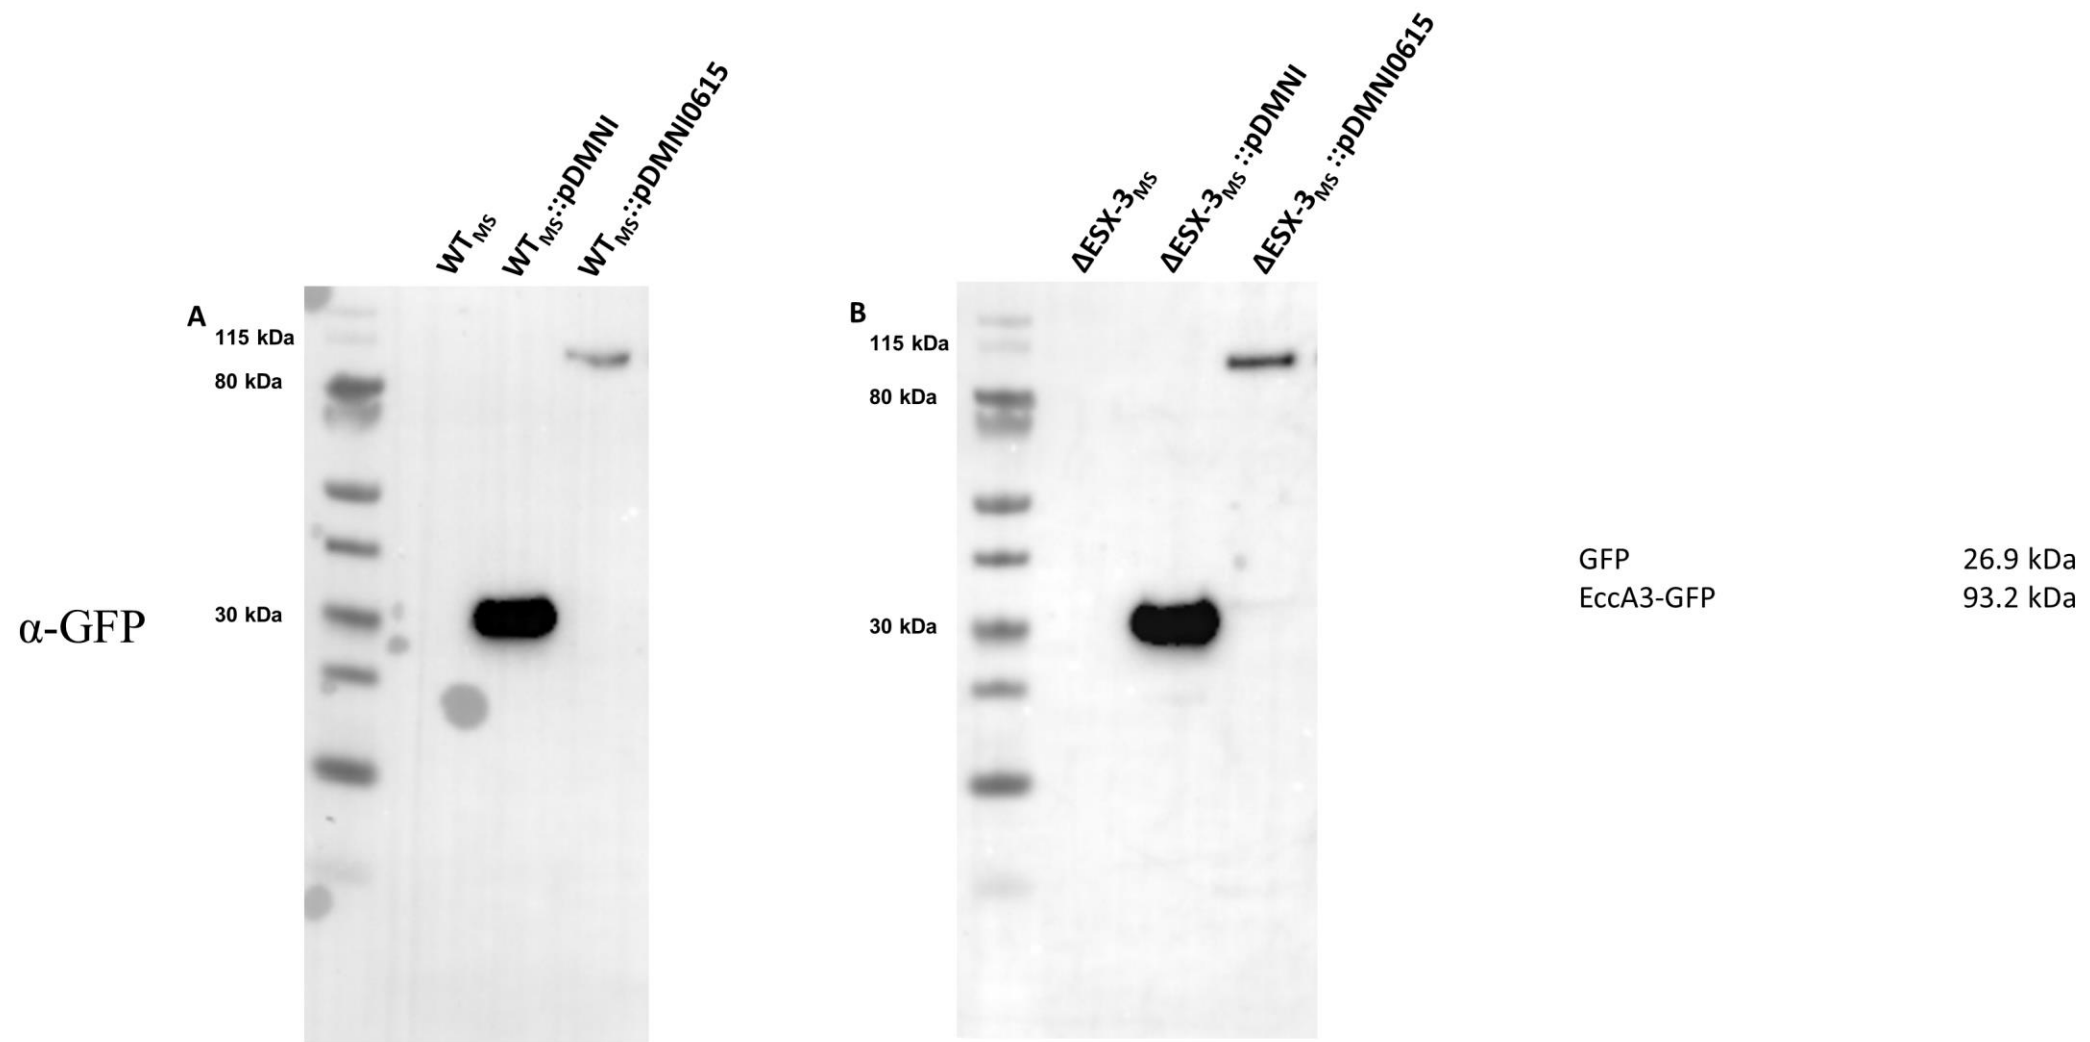

**Figure S1. Detection of C-terminally GFP-tagged proteins in *M. smegmatis* and ESX-3 knockout *M. smegmatis*.** Western blotting was used to confirm the expression of GFP-tagged EccA<sub>3</sub> in WT<sub>MS</sub> (A) and  $\Delta$ ESX-3<sub>MS</sub> (B) using an anti-GFP antibody. Full length GFP and EccA<sub>3</sub> was detected in both WT<sub>MS</sub> and  $\Delta$ ESX-3<sub>MS</sub>. The full-length blots are presented in Supplementary Figure S4.

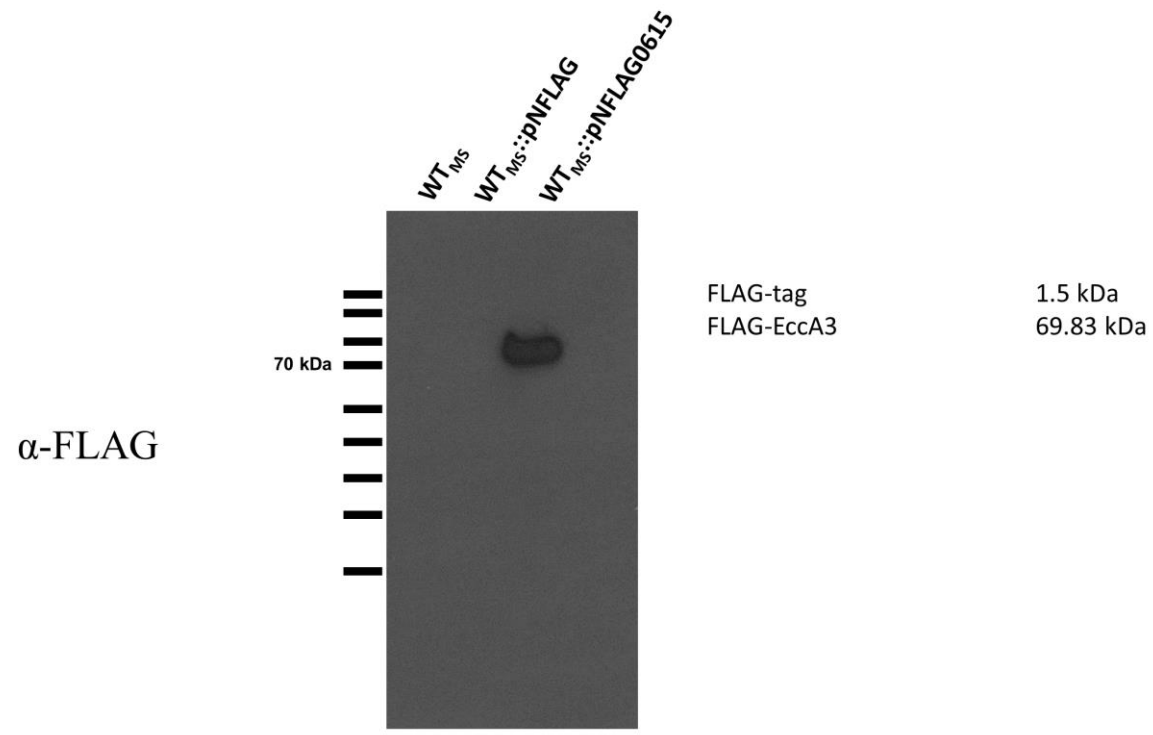

**Figure S2. Detection of N-terminally FLAG-tagged proteins in *M. smegmatis*.** Western blotting was used to confirm the expression of FLAG-tagged EccA<sub>3</sub> using an anti-FLAG antibody in WT<sub>MS</sub>. The full-length blot is presented in Supplementary Figure S5.

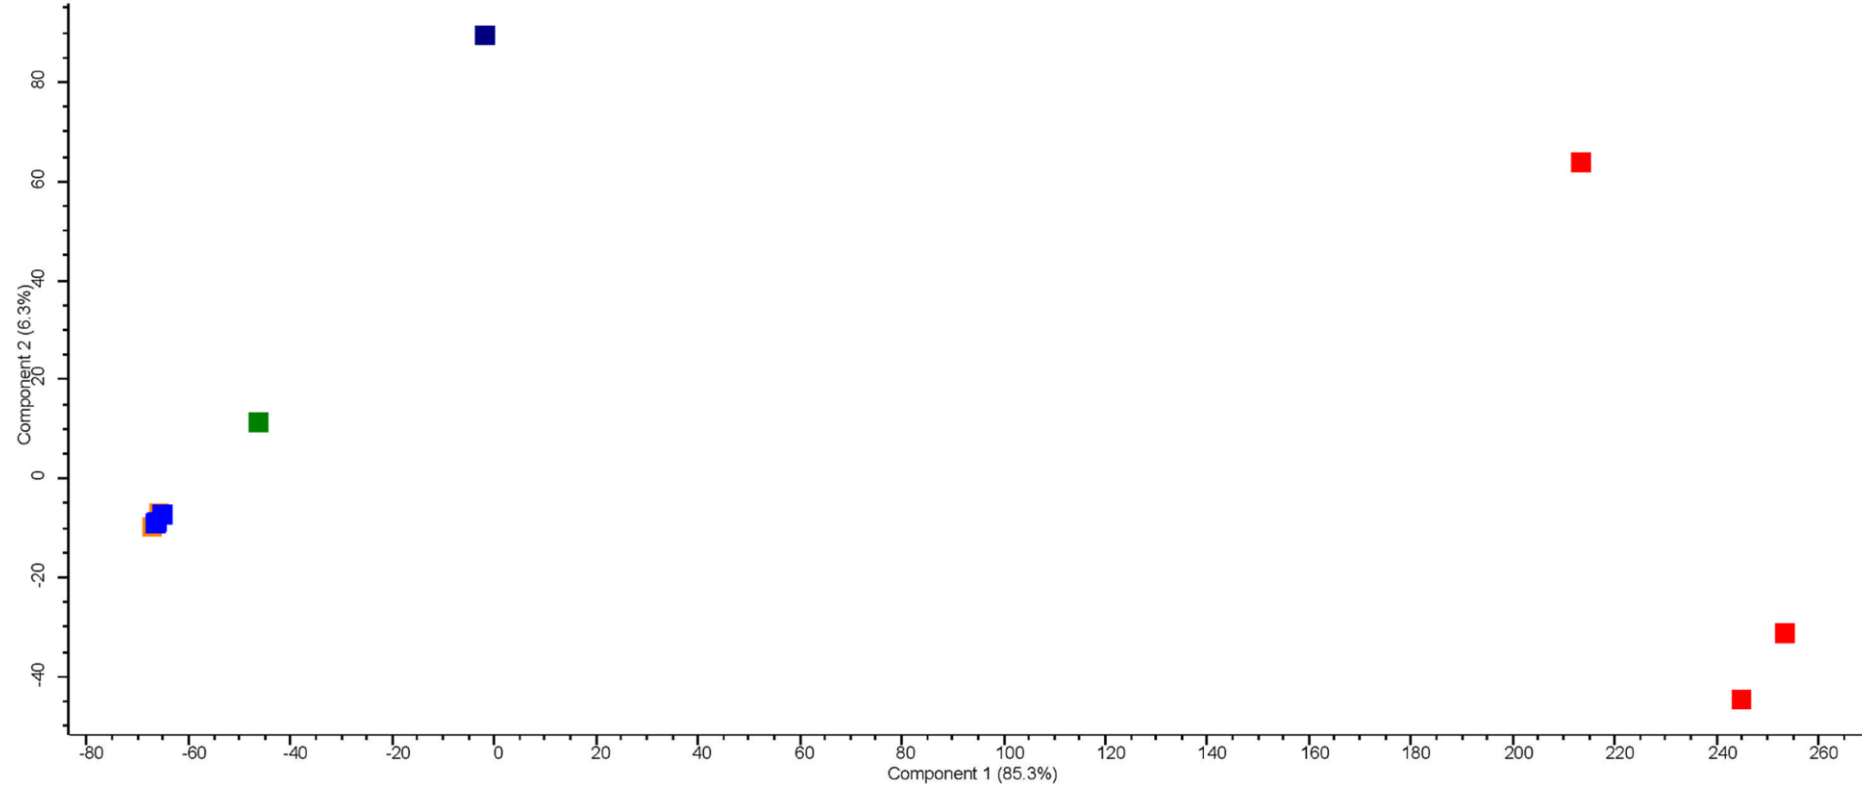

**Figure S3. Principal component analysis of immunoprecipitations.** Principal component analysis revealed separate clustering of anti-FLAG-Ecca3 immunoprecipitations (red) from control immunoprecipitations for the 270 protein groups identified with at least two unique peptides. Protein G Dynabead control immunoprecipitations (blue), anti-FLAG control immunoprecipitations from WT<sub>MS</sub> (orange) and WT<sub>MS</sub>::pNFLAG (green) and anti-MYH7 control immunoprecipitations (dark blue) clustered on the left, separate from anti-FLAG-Ecca3 immunoprecipitations on the right.

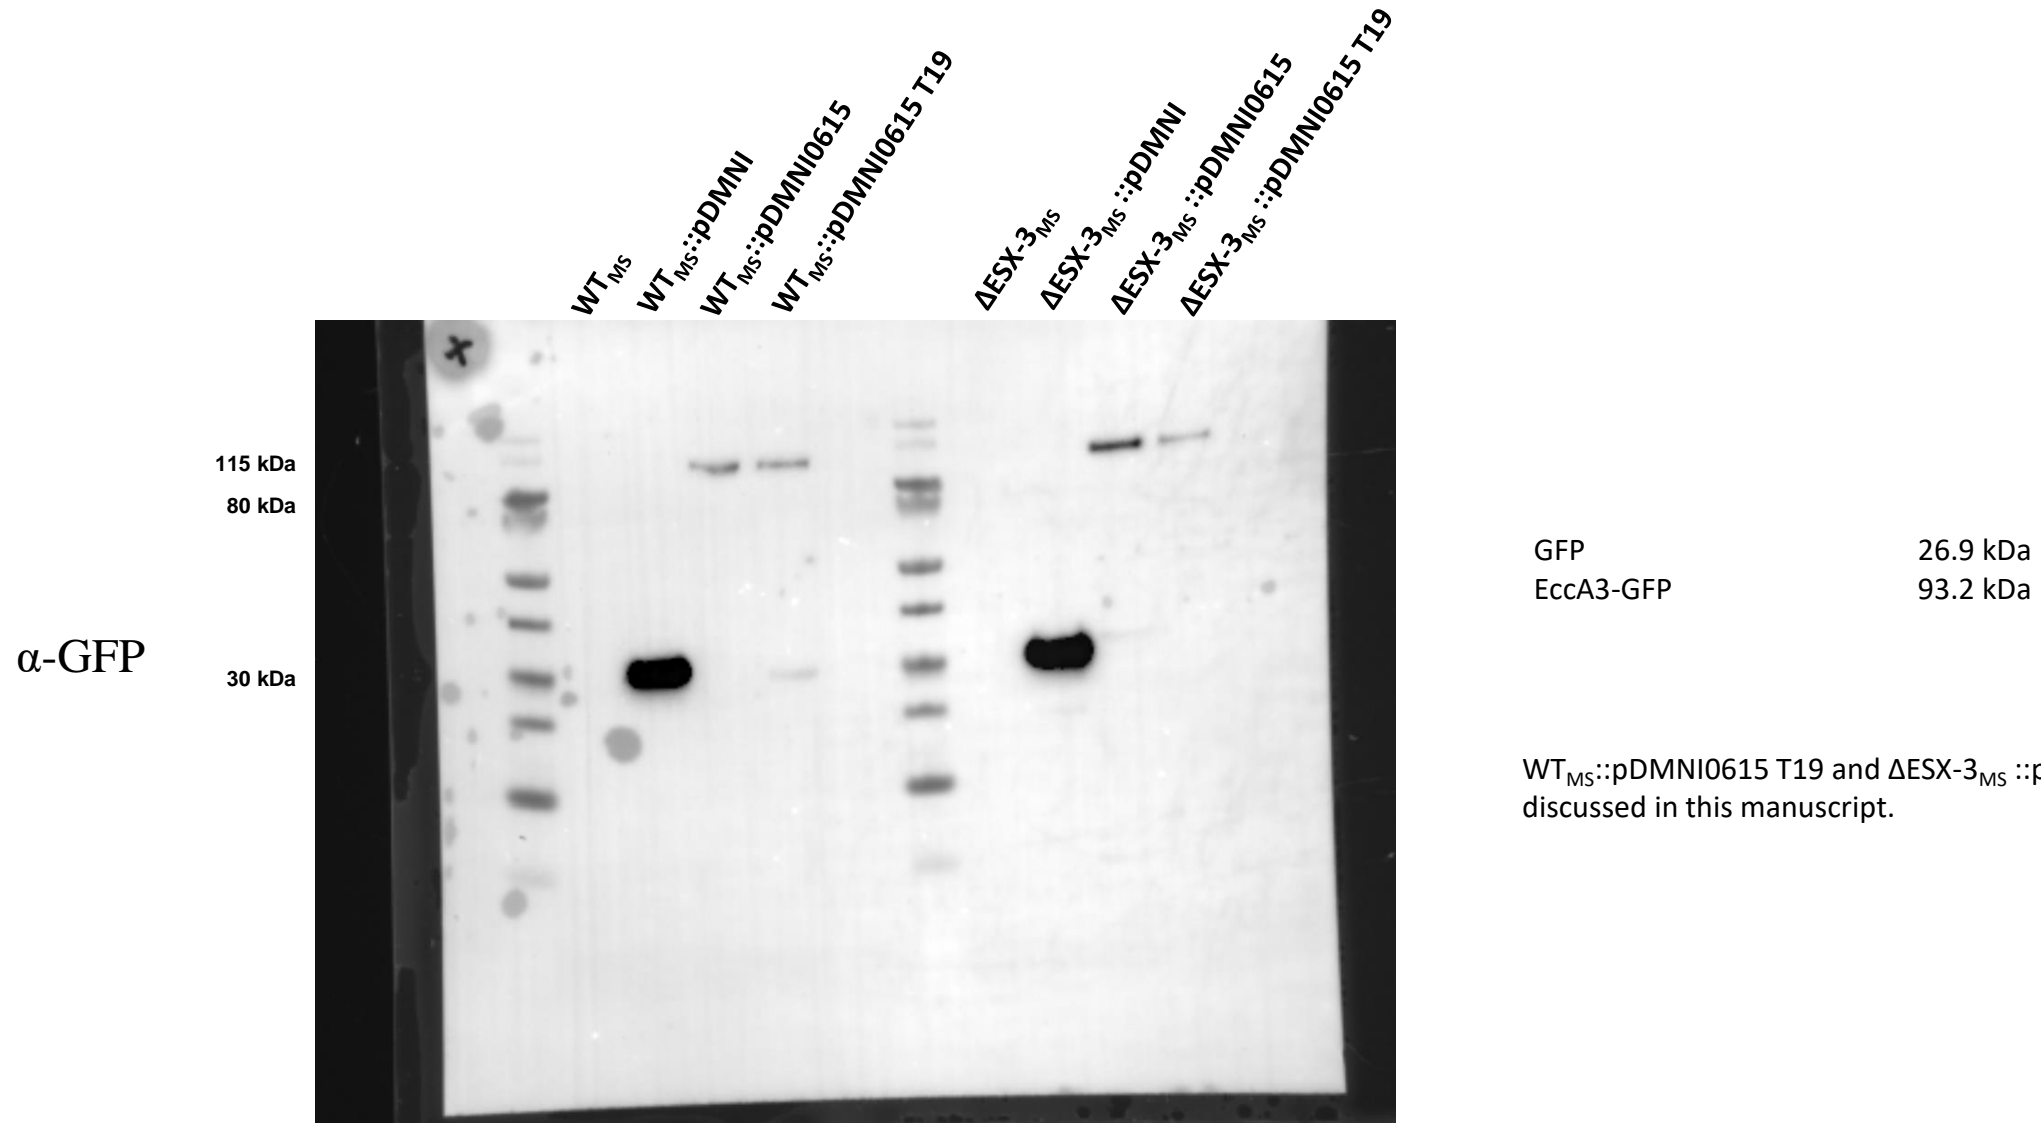

**Figure S4. Detection of C-terminally GFP-tagged proteins in *M. smegmatis* and ESX-3 knockout *M. smegmatis*.** Western blotting was used to confirm the expression of GFP-tagged EccA<sub>3</sub> in WT<sub>MS</sub> and  $\Delta$ ESX-3<sub>MS</sub> using an anti-GFP antibody. Full length GFP and EccA<sub>3</sub> was detected in both WT<sub>MS</sub> and  $\Delta$ ESX-3<sub>MS</sub>.

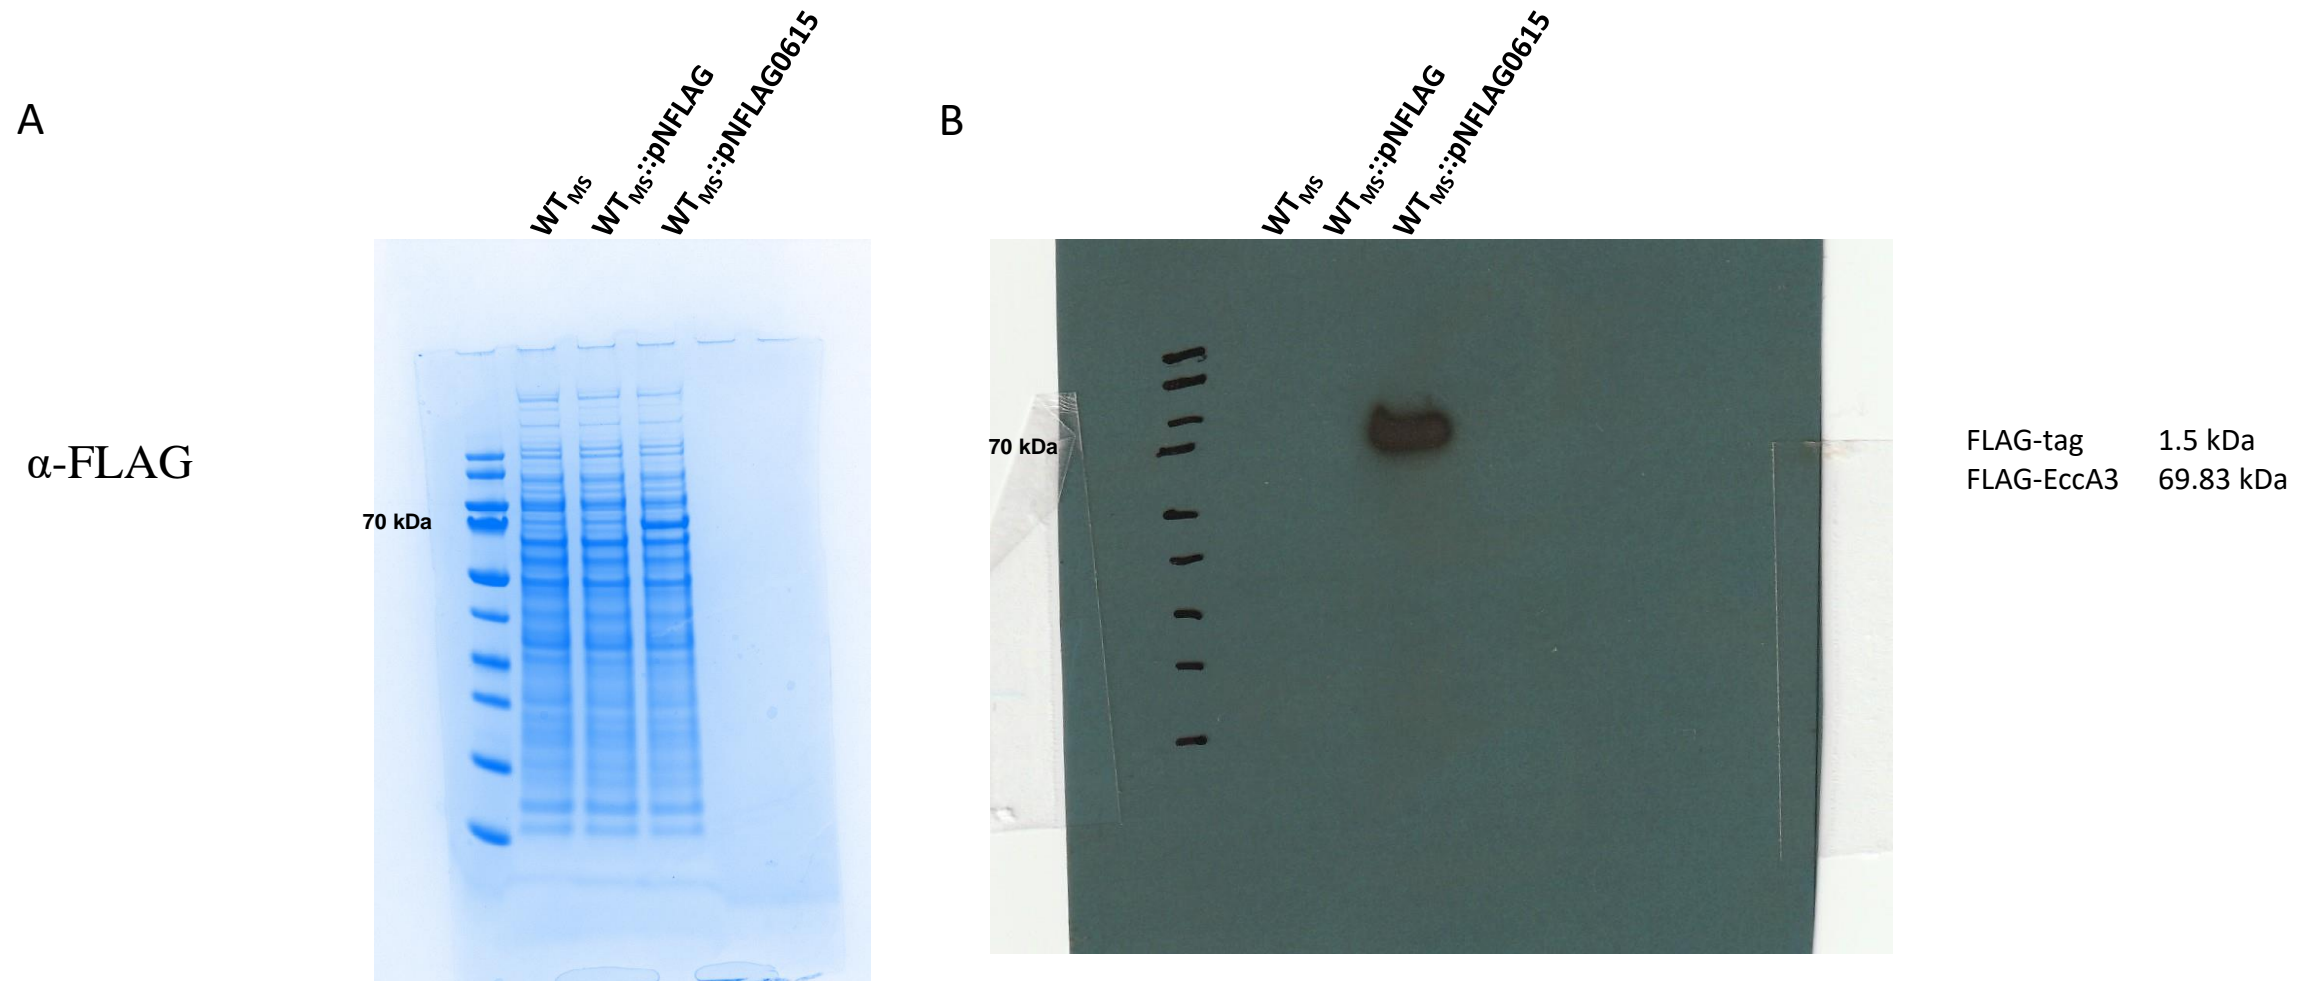

**Figure S5. Detection of N-terminally FLAG-tagged proteins in *M. smegmatis*.** **A.** SDS-PAGE of WT<sub>MS</sub> and transformant strains WT<sub>MS</sub>::pNFLAG and WT<sub>MS</sub>::pNFLAG0615 cell lysates. **B.** Western blotting was used to confirm the expression of FLAG-tagged EccA<sub>3</sub> using an anti-FLAG antibody in WT<sub>MS</sub>.
